# Supplementary material for: Can the 'Pregnant Index' be used as a diagnostic marker in the diagnosis of acute appendicitis in pregnant women?
Source: Research Square preprint supplement (doi:10.21203/rs.3.rs-4704462/v1), 2024-08-09
Supplement: Supplementary file 1 [file 350a27f4a158de2917e18db7.docx]

| Variables | Cut-Off | Diagnostic Values | | | | | ROC Curve | | | Odds Ratio | | |
| --- | --- | --- | --- | --- | --- | --- | --- | --- | --- | --- | --- | --- |
| Sensitivity | Specificity | PPV | NPV | Accuracy | Area (SE) | %95 CI | p | Odds Ratio | %95 CI | p |
| NLR | 6.51 | 53.3% | 96.7% | 94.1% | 67.4% | 75.0% | 0.751 (0.066) | 0.622-0.880 | 0.001 | 33 | 3.984-275.727 | <0.001 |
| PLR | 170.04 | 50.0% | 86.7% | 78.9% | 63.4% | 68.3% | 0.691 (0.070) | 0.553-0.829 | 0.011 | 6.5 | 1.820-23.213 | 0.005 |
| CAR | 4.87 | 60.0% | 90.0% | 85.7% | 69.2% | 75.0% | 0.749 (0.067) | 0.617-0.881 | 0.001 | 13.5 | 3.333-54.673 | <0.001 |
| PGIndex | 10.62 | 73.3% | 96.7% | 95.7% | 78.4% | 85.0% | 0.842 (0.056) | 0.733-0.952 | <0.001 | 79.75 | 9.276-685.633 | <0.001 |
| *Table 3: Cut-off points and diagnostic values of variables for the distinction between pregnant non-appendicitis and pregnant appendicitis patients PGIndex: NE*CRP/MPV* | | | | | | | | | | | | |
