# Supplementary material for: Can the 'Pregnant Index' be used as a diagnostic marker in the diagnosis of acute appendicitis in pregnant women?
Source: Research Square preprint supplement (doi:10.21203/rs.3.rs-4704462/v1), 2024-08-09
Supplement: Supplementary file 2 [file 46310cf87a1cc2f703788ea6.docx]

| Variables | Cut-Off | Diagnostic Values | | | | | ROC Curve | | | Odds Ratio | | |
| --- | --- | --- | --- | --- | --- | --- | --- | --- | --- | --- | --- | --- |
| Sensitivity | Specificity | PPV | NPV | Accuracy | Area (SE) | %95 CI | p | Odds Ratio | %95 CI | p |
| NLR | 3.33 | 66.7% | 90.0% | 87.0% | 73.0% | 78.3% | 0.751 (0.070) | 0.613-0.889 | 0.001 | 18 | 4.378-74.012 | <0.001 |
| CAR | 1.08 | 73.3% | 96.7% | 95.7% | 78.4% | 85.0% | 0.834 (0.058) | 0.722-0.947 | <0.001 | 79.75 | 9.276-685.633 | <0.001 |
| MLR | 0.33 | 50.0% | 80.0% | 71.4% | 61.5% | 65.0% | 0.654 (0.072) | 0.514-0.795 | 0.040 | 4 | 1.272-12.578 | 0.029 |
| *Table 2: Cut-off points and diagnostic values of variables for the distinction between normal and appendicitis patients* | | | | | | | | | | | | |
