# Supplementary material for: Can the 'Pregnant Index' be used as a diagnostic marker in the diagnosis of acute appendicitis in pregnant women?
Source: Research Square preprint supplement (doi:10.21203/rs.3.rs-4704462/v1), 2024-08-09
Supplement: Supplementary file 3 [file d67efe289faa868c1b9d9491.docx]

| Variables | All Patients | Non-Pregnant Patients | Pregnant Patients | Normal | Appendicitis | Statistical Significance | Pregnant | Pregnant Appendicitis | Statistical Significance |
| --- | --- | --- | --- | --- | --- | --- | --- | --- | --- |
| Age | 30.20±7.39 (29.5) | 28.63±7.00 (29.50) | 28.77±6.49 (28.00) | 29.53±6.97 (31.00) | 27,73±7,05 (25,50) | 0,245 | 30,00±5,53 (29,50) | 27,53±7,21 (25,50) | 0,094 |
| Gestational Weeks | 19.02±8.75 (20) |  | 19.02±8.75 (20.00) |  | | | 21,23±10,05 (24,50) | 16,80±6,68 (17,50) | 0,035 |
| WBC | 10.59±4.37 (9.52) | 10.10±4.61 (8.52) | 11.08±4.09 (9.74) | 7.19±1.56 (7.15) | 13,01±4,83 (13,28) | <0,001 | 9,43±1,89 (9,62) | 12,73±4,97 (12,61) | 0,002 |
| HGB | 12.03±1.35 (12) | 12.31±1.47 (12.50) | 11.75±1.16 (11.85) | 12.41±1.60 (12.60) | 12,21±1,35 (12,40) | 0,596 | 12,01±0,94 (12,00) | 11,49±1,31 (11,80) | 0,085 |
| NE | 8.23±3.94 (6.96) | 7.88±3.99 (6.66) | 8.58±3.90 (7.19) | 5.72±0.95 (5.52) | 10,05±4,66 (9,92) | <0,001 | 6,86±1,60 (6,78) | 10,30±4,71 (9,78) | 0,005 |
| LY | 1.87±0.77 (1.83) | 2.13±0.84 (2.17) | 1.61±0.60 (1.72) | 2.21±0.53 (2.33) | 2,05±1,07 (1,75) | 0,067 | 1,79±0,42 (1,76) | 1,43±0,70 (1,44) | 0,020 |
| PLT | 250.41±71.69 (244.5) | 270.48±65.49 (268.00) | 230.33±72.50 (217.00) | 286.07±68.31 (280.00) | 254,90±59,64 (255,50) | 0,069 | 232,93±71,61 (233,00) | 227,73±74,51 (207,00) | 0,589 |
| MPV | 10.04±1.28 (10.05) | 10.15±1.25 (10.15) | 9.93±1.31 (9.85) | 10.40±1.43 (10.30) | 9,90±0,98 (9,95) | 0,242 | 10,44±0,99 (10,40) | 9,42±1,40 (9,25) | 0,002 |
| Alb | 3.82±0.61 (3.85) | 4.23±0.34 (4.20) | 3.42±0.54 (3.50) | 4.23±0.30 (4.20) | 4,22±0,38 (4,20) | 0,949 | 3,15±0,57 (3,05) | 3,68±0,36 (3,70) | <0,001 |
| CRP | 6.84 (3.02-183) | 3.23 (3.02-152) | 10.1 (3.02-183) | 3.14 (3.02-6.38) | 24,9 (3,02-152) | <0,001 | 8,31 (3,3-21,1) | 22,45 (3,02-183) | <0,001 |
| MO | 0.58±0.24 (0.54) | 0.59±0.27 (0.52) | 0.58±0.21 (0.59) | 0.55±0.25 (0.47) | 0,63±0,28 (0,58) | 0,178 | 0,60±0,16 (0,63) | 0,56±0,25 (0,55) | 0,482 |
| NLR | 3.73 (1.33-56.13) | 2.91 (1.33-28.06) | 4.44 (2.04-56.13) | 2.52 (1.69-8.48) | 4,59 (1,33-28,06) | 0,001 | 3,91 (2,09-7,07) | 7 (2,04-56,13) | 0,001 |
| PLR | 132.36 (43.66-803.85) | 125.05 (52.21-575) | 148.12 (43.66-803.85) | 120.7 (67.5-575) | 130,66 (52,21-487,1) | 0,745 | 126,62 (67,3-232,63) | 168,78 (43,66-803,85) | 0,011 |
| CAR | 2.24 (0.64-54.85) | 0.8 (0.64-33.78) | 3.3 (0.7-54.85) | 0.76 (0.64-1.56) | 5,3 (0,66-33,78) | <0,001 | 2,38 (0,79-6,39) | 6,08 (0,7-54,85) | 0,001 |
| PMR | 24.24 (8.54-59.34) | 25.53 (8.54-59.3) | 22.34 (9.83-59.34) | 25.83 (12.35-59.3) | 24,97 (8,54-51,15) | 0,274 | 22,3 (9,83-43,3) | 22,45 (12,19-59,34) | 0,574 |
| MLR | 0.3 (0.13-2.75) | 0.24 (0.13-0.9) | 0.36 (0.15-2.75) | 0.22 (0.13-0.65) | 0,33 (0,13-0,9) | 0,040 | 0,36 (0,16-0,53) | 0,35 (0,15-2,75) | 0,425 |
| *Table 1: All patients and groups data and comparison of variables between groups* | | | | | | PGIndex | 5.22 (1.57-20.62) | 18.71 (1.74-438.3) | <0.001 |
